# Supplementary material for: Fully plant-derived flaxseed mucilage-soy protein inks for extrusion-based 3D printing of tunable hydrogel scaffolds
Source: Royal Society of Chemistry journal article supplement (doi:10.1039/d6ra00817h), 2026-05-19
Supplement: d6ra00817h1.pdf [file d6ra00817h1.pdf]

## SUPPLEMENTARY DATA

### **Fully Plant-Derived Flaxseed Mucilage–Soy Protein inks for Extrusion-Based 3D Printing of Tunable Hydrogel Scaffolds.**

**Pooja Kumari<sup>‡</sup>, Rishabh Rai Kaushik<sup>‡</sup>, Snehlata Yadav<sup>‡</sup>, and Sanjeev Kumar Mahto<sup>‡\*</sup>**

<sup>‡</sup>Tissue Engineering and Biomicrofluidics Laboratory, School of Biomedical Engineering, Indian Institute of Technology (Banaras Hindu University), Varanasi, Uttar Pradesh 221005, India.

**\*Corresponding author: Dr. Sanjeev Kumar Mahto**

**Address: Tissue Engineering and Biomicrofluidics Laboratory, School of Biomedical Engineering, Indian Institute of Technology (BHU), Varanasi 221005, India**

**Email id: [skmahto.bme@iitbhu.ac.in](mailto:skmahto.bme@iitbhu.ac.in)**

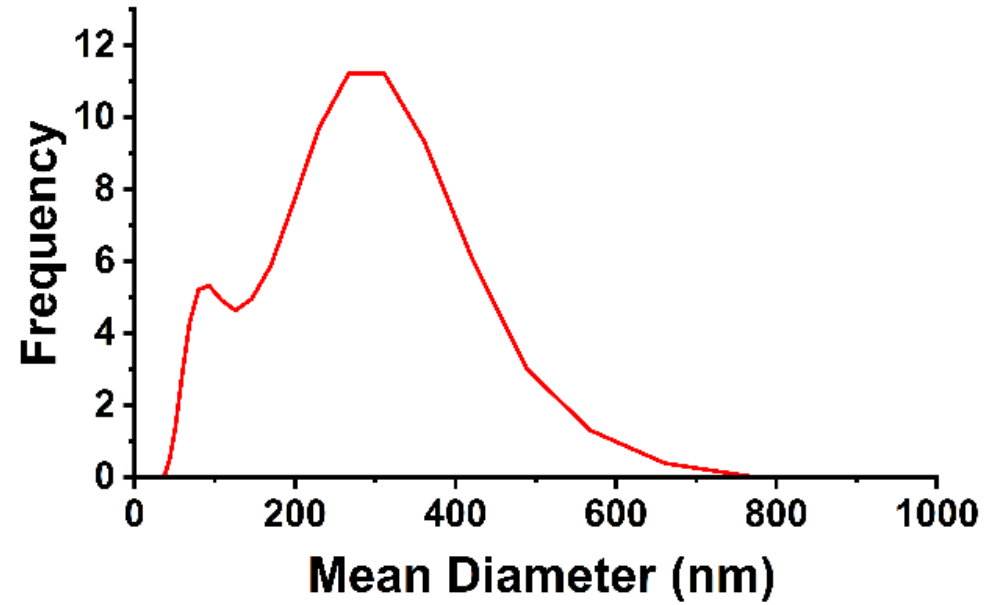

**S1:** Represents the particle size distribution of flaxseed mucilage powder obtained by dynamic light scattering.

# Filament formation test

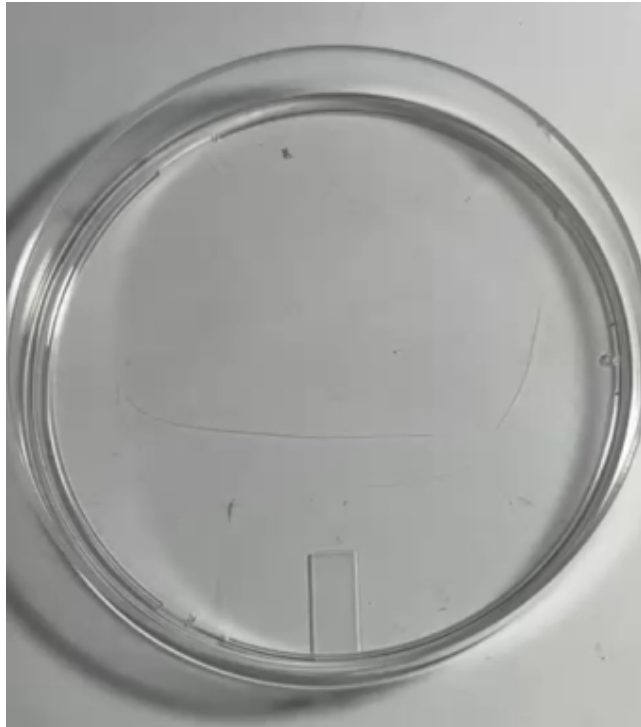

**S2:** 3% FSM ink filament formation test

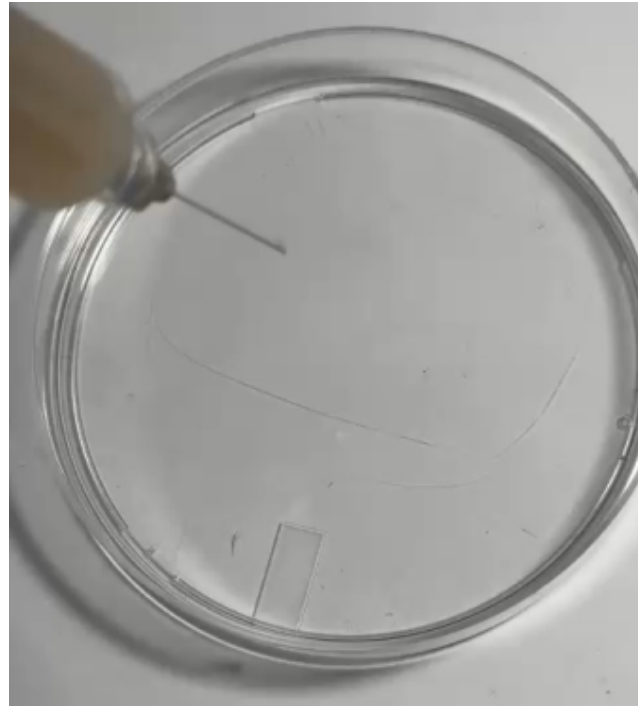

**S3:** 4% FSM ink filament formation test

**Droplet-like structure at lower concentration**

## Filament formed at higher concentration

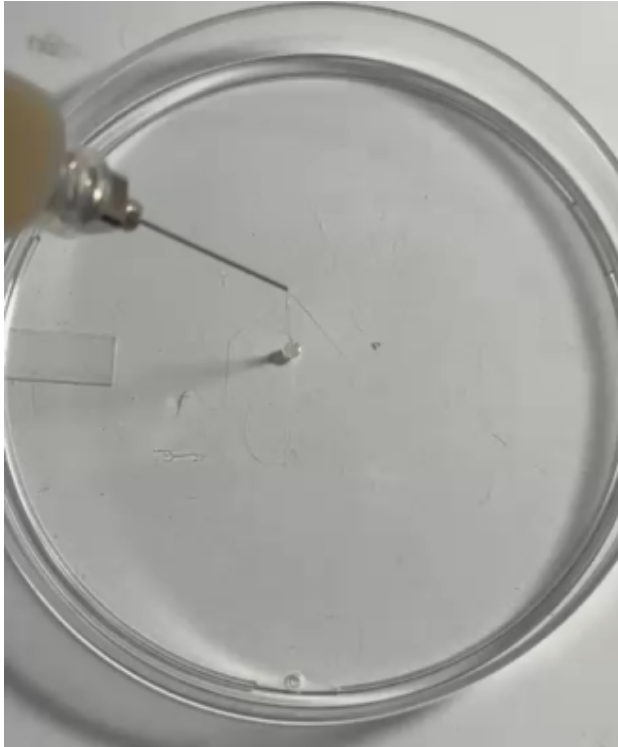

**S4:** 5% FSM ink filament formation test

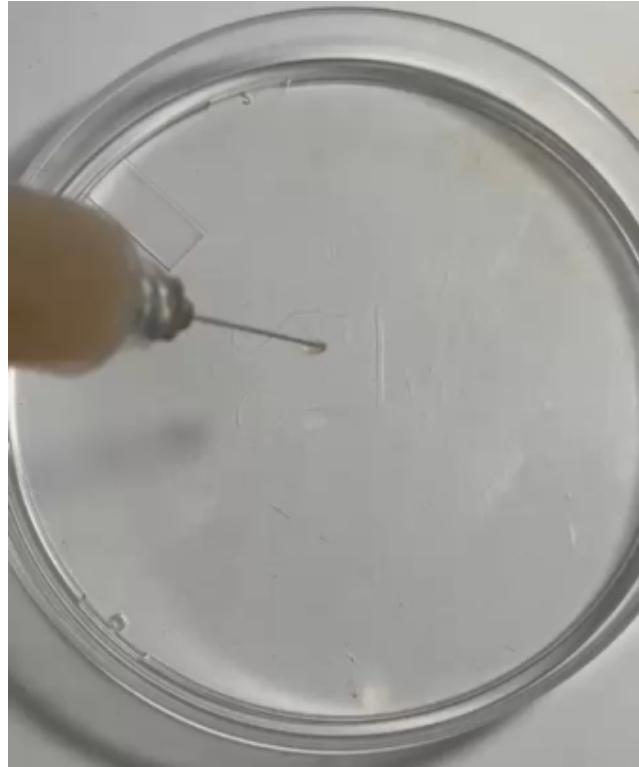

**S5:** 6% FSM ink filament formation test

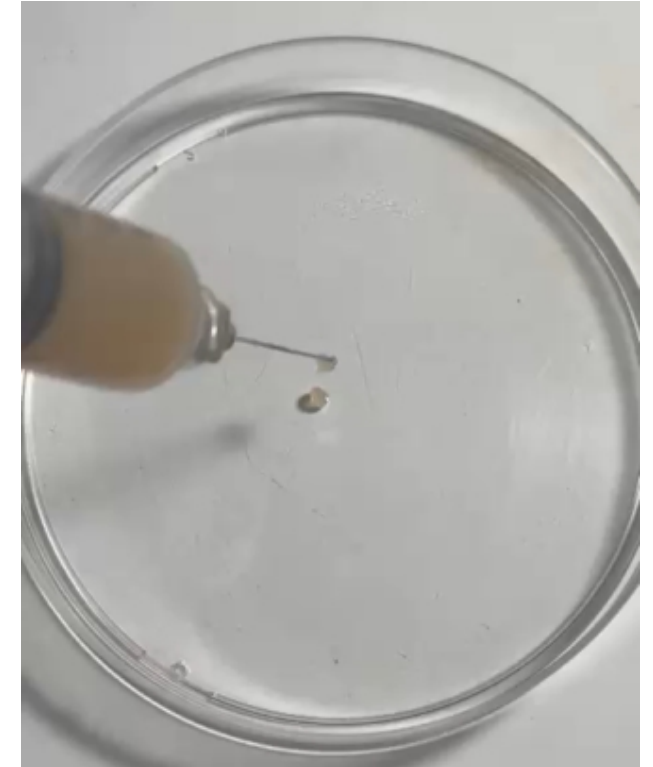

**S6:** 7% FSM ink filament formation test

## Filament formed at higher concentration

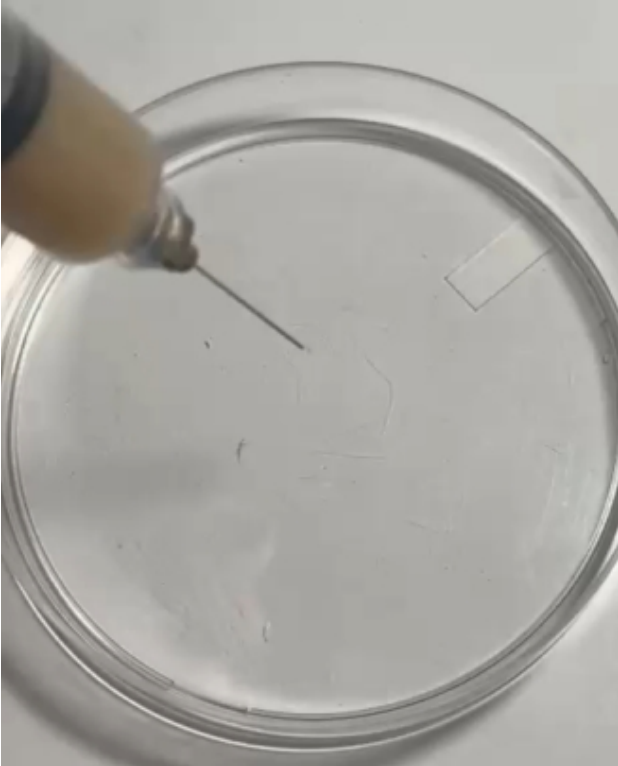

**S7:** 5% FSM + 4% SPI ink  
filament formation test

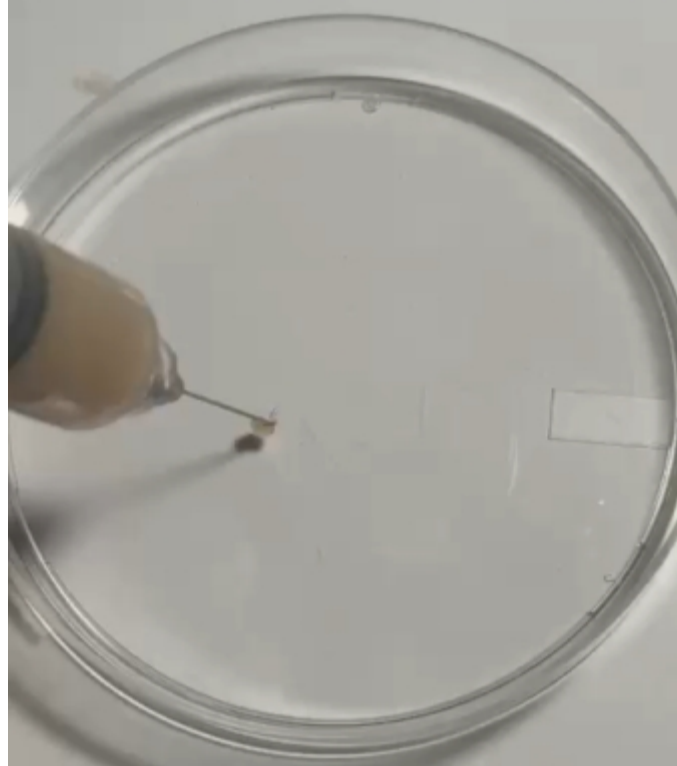

**S8:** 5% FSM + 4% SPI ink  
filament formation test

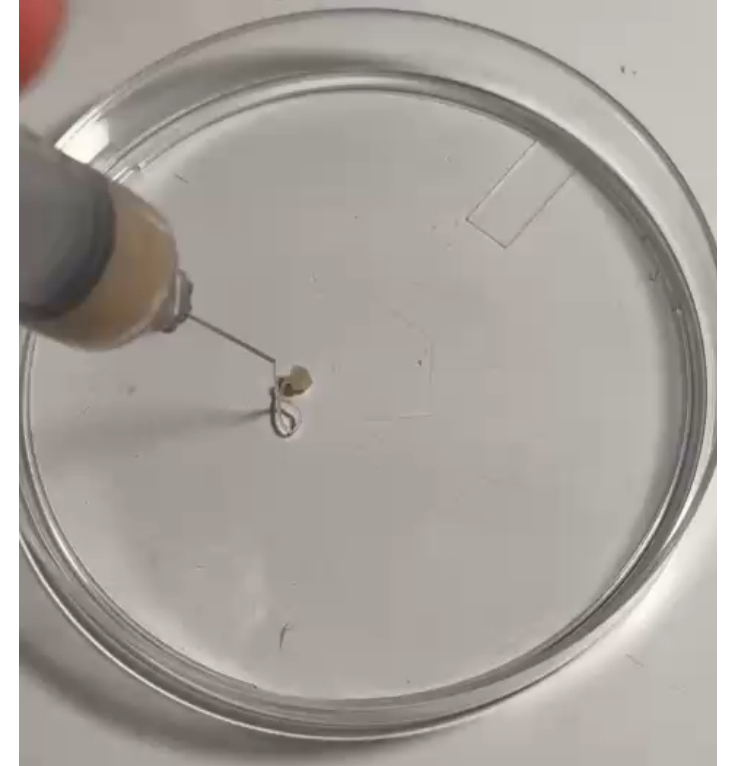

**S9:** 5% FSM + 4% SPI ink  
filament formation test

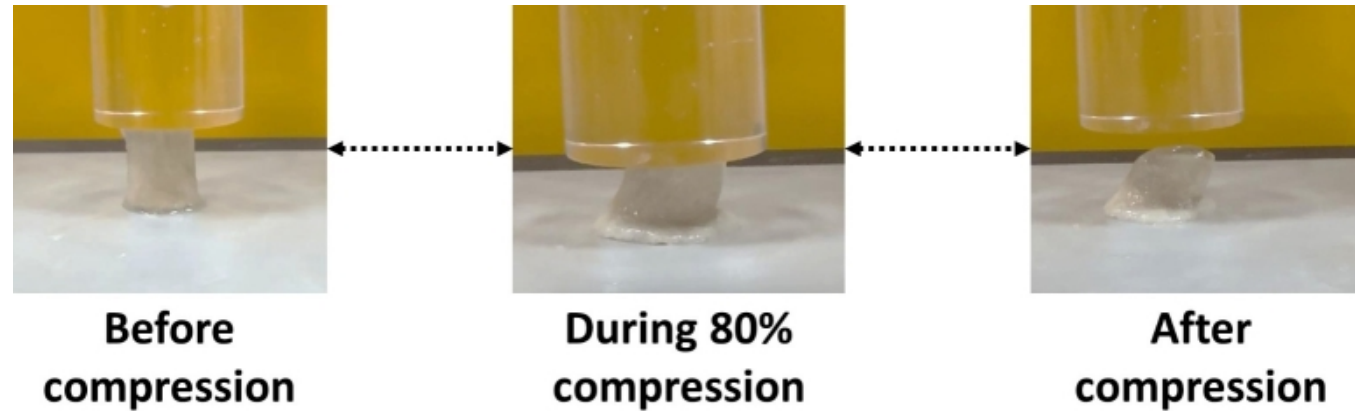

**S10:** A visual representation of scaffold deformation under 80% uniaxial compression. The scaffolds demonstrated permanent deformation and a loss of structural integrity, with minimal shape recovery upon load removal
